# Supplementary material for: Amino-functionalized copper-based metal–organic frameworks for highly selective and sensitive detection of hypochlorite
Source: Royal Society of Chemistry journal article supplement (doi:10.1039/d0nj04256k), 2020-01-01
Supplement: d0nj04256k1.pdf [file d0nj04256k1.pdf]

## Supporting Information

### Amino-functionalized copper-based metal-organic frameworks for high selectivity and sensitive detection of hypochlorite

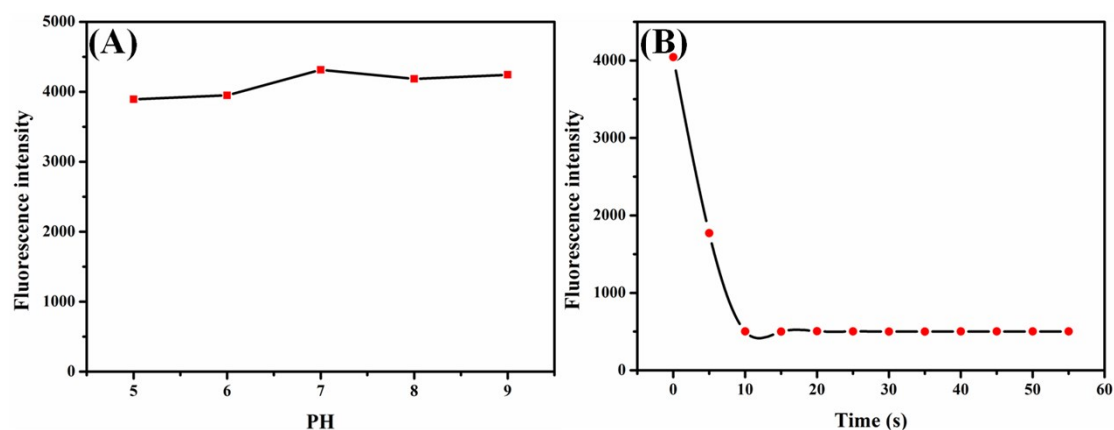

Fig. S1 (A) pH-dependent fluorescence changes of NH<sub>2</sub>-Cu-MOFs and (B) Time-dependent to the fluorescence intensity of NH<sub>2</sub>-Cu-MOFs in the presence of 12.5 μM ClO<sup>-</sup>.

Table S1 Results for the determination of hypochlorite in tap water.

| Samples | Added (μM) | Found (μM) | Recovery (%) | RSD (n) |
|---------|------------|------------|--------------|---------|
| 1       | 2          | 2.1325     | 1.0663       | 1.6     |
| 2       | 4          | 4.034      | 1.0085       | 1.2     |
| 3       | 8          | 8.1016     | 0.9873       | 0.4     |
